# Supplementary material for: Assessment of Treatment Strategies to Achieve Hepatitis C Elimination in Canada Using a Validated Model
Source: PubMed Central journal article supplement (PMC7203608; doi:10.1001/jamanetworkopen.2020.4192), 2020-05-06
Supplement: jamanetwopen-3-e204192-s001.pdf [file jamanetwopen-3-e204192-s001.pdf]

## Supplementary Online Content

Binka M, Janjua NZ, Grebely J, et al. Assessment of treatment strategies to achieve hepatitis C elimination in Canada using a validated model. *JAMA Netw Open*. 2020;3(5):e204192.  
doi:10.1001/jamanetworkopen.2020

**eTable 1.** Quinquennial Canadian Population by Sex and 5-Year Age Groups, 1950 to 2015

**eTable 2.** Reported Hepatitis C (HCV) Cases in Canada by Sex and 5-Year Age Groups, 2000 to 2015

**eTable 3.** Fixed Input Parameters: New HCV Diagnoses

**eTable 4.** Fixed Input Parameters: Treatment Eligibility Requirements and New Infections

**eTable 5.** Sustained Virologic Response Rates Applied in the Model

**eTable 6.** Treatment Scenario Assumptions Entered Into the Model

**eTable 7.** Treatment Scenarios: Annual Number of Treated Individuals

**eFigure 1.** Flow Diagram of Disease Progression Within the Model

**eFigure 2.** Projected Trends in HCV-Associated Outcomes With Each Treatment Scenario

**eFigure 3.** Advanced Liver Disease Diagnoses Among Patients Achieving Sustained Virologic Response After HCV Treatment

### eReferences

This supplementary material has been provided by the authors to give readers additional information about their work.

**eTable 1. Quinquennial Canadian Population by Sex and 5-Year Age Groups, 1950-2015<sup>1</sup>**

This table presents the estimated Canadian population size from 1950-2015, organized by year, sex and age groupings, as obtained from the United Nations population database.<sup>1</sup>

| Sex                 | Age Group | 1950 | 1955 | 1960 | 1965 | 1970 | 1975 | 1980 | 1985 | 1990 | 1995 | 2000 | 2005 | 2010 | 2015 |     |
|---------------------|-----------|------|------|------|------|------|------|------|------|------|------|------|------|------|------|-----|
| Male <sup>a</sup>   | 0-4       | 835  | 992  | 1139 | 1154 | 963  | 909  | 920  | 948  | 988  | 1018 | 918  | 882  | 965  | 996  |     |
|                     | 5-9       | 671  | 886  | 1040 | 1155 | 1172 | 995  | 931  | 933  | 987  | 1021 | 1044 | 956  | 930  | 997  |     |
|                     | 10-14     | 571  | 701  | 911  | 1045 | 1171 | 1200 | 1014 | 943  | 964  | 1025 | 1055 | 1086 | 993  | 952  |     |
|                     | 15-19     | 544  | 576  | 702  | 902  | 1057 | 1198 | 1231 | 1042 | 995  | 1020 | 1078 | 1120 | 1141 | 1089 |     |
|                     | 20-24     | 552  | 563  | 587  | 694  | 935  | 1099 | 1225 | 1272 | 1083 | 1024 | 1061 | 1134 | 1217 | 1273 |     |
|                     | 25-29     | 550  | 600  | 619  | 606  | 773  | 1018 | 1104 | 1232 | 1301 | 1107 | 1053 | 1096 | 1215 | 1231 |     |
|                     | 30-34     | 513  | 586  | 643  | 630  | 656  | 821  | 1026 | 1112 | 1275 | 1322 | 1143 | 1101 | 1152 | 1261 |     |
|                     | 35-39     | 488  | 549  | 620  | 646  | 651  | 674  | 817  | 1022 | 1140 | 1289 | 1351 | 1190 | 1154 | 1188 |     |
|                     | 40-44     | 432  | 510  | 554  | 612  | 646  | 659  | 678  | 810  | 1039 | 1148 | 1303 | 1386 | 1220 | 1172 |     |
|                     | 45-49     | 378  | 443  | 507  | 536  | 606  | 636  | 645  | 660  | 808  | 1035 | 1149 | 1312 | 1406 | 1216 |     |
|                     | 50-54     | 338  | 375  | 432  | 489  | 517  | 595  | 619  | 629  | 656  | 792  | 1024 | 1147 | 1308 | 1401 |     |
|                     | 55-59     | 296  | 317  | 355  | 403  | 466  | 487  | 566  | 599  | 618  | 643  | 775  | 997  | 1129 | 1313 |     |
|                     | 60-64     | 263  | 265  | 286  | 322  | 373  | 435  | 453  | 530  | 572  | 595  | 616  | 755  | 967  | 1101 |     |
|                     | 65-69     | 221  | 236  | 238  | 251  | 287  | 332  | 386  | 407  | 490  | 526  | 552  | 578  | 715  | 944  |     |
|                     | 70-74     | 156  | 183  | 195  | 197  | 203  | 238  | 274  | 322  | 351  | 421  | 461  | 491  | 523  | 654  |     |
|                     | 75-79     | 92   | 111  | 131  | 139  | 141  | 148  | 177  | 206  | 250  | 272  | 336  | 380  | 417  | 453  |     |
|                     | 80+       | 65   | 83   | 103  | 124  | 139  | 145  | 155  | 181  | -    | -    | -    | -    | -    | -    |     |
|                     | 80-84     | -    | -    | -    | -    | -    | -    | -    | -    | -    | 134  | 164  | 187  | 246  | 297  | 321 |
|                     | 85-89     | -    | -    | -    | -    | -    | -    | -    | -    | -    | 58   | 70   | 88   | 106  | 150  | 189 |
|                     | 90-94     | -    | -    | -    | -    | -    | -    | -    | -    | -    | 18   | 22   | 26   | 35   | 45   | 67  |
| 95-99               | -         | -    | -    | -    | -    | -    | -    | -    | -    | 4    | 4    | 5    | 6    | 9    | 12   |     |
| 100+                | -         | -    | -    | -    | -    | -    | -    | -    | -    | 1    | 1    | 1    | 1    | 1    | 1    |     |
| Female <sup>a</sup> | 0-4       | 801  | 951  | 1088 | 1096 | 920  | 862  | 874  | 900  | 942  | 968  | 876  | 835  | 917  | 948  |     |
|                     | 5-9       | 645  | 850  | 996  | 1106 | 1118 | 948  | 883  | 886  | 936  | 972  | 994  | 910  | 876  | 951  |     |
|                     | 10-14     | 554  | 673  | 872  | 1001 | 1121 | 1146 | 964  | 899  | 915  | 973  | 1003 | 1037 | 944  | 899  |     |
|                     | 15-19     | 534  | 564  | 678  | 875  | 1025 | 1154 | 1181 | 987  | 943  | 964  | 1019 | 1058 | 1088 | 1028 |     |

| Sex                 | Age Group | 1950 | 1955 | 1960 | 1965 | 1970 | 1975 | 1980 | 1985 | 1990 | 1995 | 2000 | 2005 | 2010 | 2015 |     |
|---------------------|-----------|------|------|------|------|------|------|------|------|------|------|------|------|------|------|-----|
| Female <sup>a</sup> | 20-24     | 558  | 559  | 591  | 699  | 924  | 1084 | 1202 | 1221 | 1046 | 989  | 1012 | 1091 | 1152 | 1221 |     |
|                     | 25-29     | 564  | 593  | 597  | 608  | 755  | 983  | 1098 | 1213 | 1268 | 1085 | 1025 | 1068 | 1184 | 1220 |     |
|                     | 30-34     | 521  | 599  | 630  | 611  | 637  | 788  | 999  | 1113 | 1262 | 1297 | 1124 | 1083 | 1151 | 1266 |     |
|                     | 35-39     | 478  | 549  | 628  | 637  | 622  | 648  | 786  | 996  | 1143 | 1285 | 1329 | 1167 | 1142 | 1200 |     |
|                     | 40-44     | 411  | 490  | 550  | 622  | 630  | 630  | 653  | 787  | 1021 | 1158 | 1303 | 1364 | 1202 | 1174 |     |
|                     | 45-49     | 353  | 411  | 487  | 537  | 617  | 627  | 625  | 647  | 793  | 1029 | 1166 | 1312 | 1388 | 1204 |     |
|                     | 50-54     | 318  | 347  | 407  | 478  | 527  | 619  | 622  | 623  | 649  | 794  | 1025 | 1167 | 1313 | 1390 |     |
|                     | 55-59     | 276  | 304  | 337  | 392  | 472  | 513  | 609  | 620  | 621  | 654  | 785  | 1018 | 1161 | 1313 |     |
|                     | 60-64     | 239  | 257  | 285  | 324  | 385  | 462  | 504  | 598  | 611  | 615  | 642  | 780  | 1005 | 1140 |     |
|                     | 65-69     | 197  | 223  | 243  | 271  | 315  | 371  | 445  | 487  | 582  | 589  | 593  | 623  | 758  | 979  |     |
|                     | 70-74     | 147  | 179  | 203  | 222  | 247  | 287  | 343  | 410  | 453  | 537  | 547  | 557  | 586  | 720  |     |
|                     | 75-79     | 92   | 111  | 136  | 159  | 184  | 208  | 246  | 296  | 359  | 392  | 471  | 488  | 503  | 536  |     |
|                     | 80+       | 80   | 102  | 127  | 160  | 198  | 236  | 284  | 344  | -    | -    | -    | -    | -    | -    |     |
|                     | 80-84     | -    | -    | -    | -    | -    | -    | -    | -    | -    | 228  | 279  | 314  | 388  | 416  | 424 |
|                     | 85-89     | -    | -    | -    | -    | -    | -    | -    | -    | -    | 123  | 151  | 186  | 215  | 276  | 304 |
|                     | 90-94     | -    | -    | -    | -    | -    | -    | -    | -    | -    | 50   | 61   | 74   | 94   | 115  | 152 |
|                     | 95-99     | -    | -    | -    | -    | -    | -    | -    | -    | -    | 13   | 16   | 19   | 24   | 32   | 41  |
|                     | 100+      | -    | -    | -    | -    | -    | -    | -    | -    | -    | 2    | 2    | 3    | 3    | 4    | 6   |

<sup>a</sup>Population estimates in thousands

**eTable 2. Reported Hepatitis C (HCV) Cases in Canada by Sex and 5-Year Age Groups, 2000-2015<sup>2</sup>**

This table presents reported HCV cases from 2000-2015, organized by year, sex and age groupings, as obtained from the Public Health Agency of Canada.<sup>2</sup> HCV cases from 2000-2015 are provided, data from 1991-2015 are available.

|                           | Age Group   | 2000 | 2001 | 2002 | 2003 | 2004 | 2005 | 2006 | 2007 | 2008 | 2009 | 2010 | 2011 | 2012 | 2013 | 2014 | 2015 |
|---------------------------|-------------|------|------|------|------|------|------|------|------|------|------|------|------|------|------|------|------|
| <b>Male<sup>a</sup></b>   | < 1         | 42   | 25   | 31   | 22   | 24   | 19   | 13   | 16   | 15   | 22   | 12   | 11   | 8    | 6    | 6    | 11   |
|                           | 1-4         | 11   | 4    | 8    | 6    | 9    | 2    | 1    | 4    | 4    | 0    | 2    | 2    | 4    | 8    | 6    | 4    |
|                           | 5-9         | 7    | 10   | 8    | 6    | 6    | 4    | 2    | 4    | 4    | 5    | 2    | 5    | 3    | 2    | 0    | 4    |
|                           | 10-14       | 21   | 27   | 10   | 5    | 10   | 7    | 7    | 3    | 8    | 5    | 6    | 3    | 2    | 3    | 1    | 7    |
|                           | 15-19       | 108  | 110  | 82   | 69   | 56   | 76   | 66   | 77   | 66   | 58   | 67   | 71   | 68   | 72   | 66   | 68   |
|                           | 20-24       | 439  | 426  | 429  | 395  | 418  | 378  | 331  | 335  | 356  | 323  | 315  | 286  | 378  | 487  | 442  | 500  |
|                           | 25-29       | 808  | 731  | 635  | 611  | 656  | 614  | 558  | 566  | 583  | 587  | 499  | 516  | 504  | 562  | 624  | 712  |
|                           | 30-39       | 3419 | 3163 | 2754 | 2333 | 2154 | 1912 | 1646 | 1534 | 1400 | 1395 | 1255 | 1186 | 1216 | 1220 | 1150 | 1322 |
|                           | 40-59       | 5597 | 5762 | 5796 | 5512 | 5409 | 4887 | 4574 | 4362 | 4426 | 4116 | 3887 | 3486 | 3292 | 3146 | 2833 | 2912 |
|                           | 60+         | 678  | 703  | 652  | 581  | 581  | 563  | 555  | 616  | 644  | 607  | 708  | 807  | 883  | 1039 | 1095 | 1228 |
|                           | Unspecified | 64   | 29   | 31   | 32   | 10   | 15   | 10   | 6    | 7    | 11   | 6    | 3    | 2    | 4    | 368  | 1    |
| <b>Female<sup>a</sup></b> | < 1         | 34   | 17   | 20   | 27   | 18   | 18   | 21   | 17   | 15   | 16   | 18   | 8    | 11   | 7    | 13   | 11   |
|                           | 1-4         | 10   | 5    | 8    | 10   | 4    | 7    | 9    | 8    | 7    | 4    | 4    | 8    | 8    | 5    | 4    | 5    |
|                           | 5-9         | 9    | 3    | 5    | 4    | 7    | 2    | 1    | 4    | 4    | 1    | 4    | 2    | 5    | 2    | 3    | 9    |
|                           | 10-14       | 22   | 16   | 19   | 11   | 6    | 12   | 6    | 5    | 9    | 7    | 5    | 8    | 3    | 4    | 5    | 3    |
|                           | 15-19       | 188  | 163  | 166  | 146  | 126  | 141  | 130  | 128  | 142  | 143  | 100  | 91   | 112  | 128  | 119  | 140  |
|                           | 20-24       | 384  | 349  | 328  | 366  | 403  | 399  | 333  | 348  | 374  | 337  | 336  | 319  | 396  | 400  | 383  | 485  |
|                           | 25-29       | 487  | 475  | 429  | 424  | 454  | 379  | 442  | 439  | 430  | 418  | 391  | 387  | 453  | 495  | 462  | 539  |
|                           | 30-39       | 1740 | 1559 | 1421 | 1279 | 1213 | 1023 | 878  | 891  | 906  | 791  | 733  | 730  | 762  | 738  | 693  | 859  |
|                           | 40-59       | 2335 | 2370 | 2448 | 2293 | 2179 | 1977 | 1879 | 2022 | 1878 | 1773 | 1670 | 1625 | 1518 | 1432 | 1321 | 1361 |
|                           | 60+         | 695  | 697  | 597  | 575  | 554  | 503  | 478  | 476  | 506  | 466  | 441  | 487  | 501  | 563  | 567  | 641  |
|                           | Unspecified | 26   | 14   | 15   | 20   | 9    | 9    | 6    | 3    | 4    | 4    | 6    | 1    | 5    | 5    | 252  | 1    |

<sup>a</sup>2000-2015 provided, 1991-2015 available.

**eTable 3. Fixed Input Parameters: New HCV diagnoses**

This table presents the number of new HCV diagnoses as added to the model. For all treatment scenarios, a 3% increase in new diagnoses was predicted from 2017-2018, a 2% increase from 2019-2020, followed by a gradual decline to 50% of the 2020 diagnosis rate in 2025, as affected persons become progressively harder to reach. Projected, input and model output counts are provided, where the average projected values for 2021-2024 were input for each of those years.

| Year <sup>b</sup> | New HCV diagnoses <sup>a</sup> |                    |              |            |                  |                |                 |
|-------------------|--------------------------------|--------------------|--------------|------------|------------------|----------------|-----------------|
|                   | Projected                      | Input              | Model Output |            |                  |                |                 |
|                   |                                |                    | Optimistic   | Aggressive | Gradual decrease | Rapid decrease | Very aggressive |
| 2015              | 8,371                          | 8,371              | 8,371        | 8,371      | 8,371            | 8,371          | 8,371           |
| 2016              | 8,674                          | 8,674              | 8,674        | 8,674      | 8,674            | 8,674          | 8,674           |
| 2017              | 8,934                          | 8,934              | 8,934        | 8,934      | 8,934            | 8,934          | 8,934           |
| 2018              | 9,202                          | 9,202              | 9,202        | 9,202      | 9,202            | 9,202          | 9,202           |
| 2019              | 9,386                          | 9,386              | 9,386        | 9,386      | 9,386            | 9,386          | 9,386           |
| 2020              | 9,574                          | 9,574              | 9,574        | 9,574      | 9,574            | 9,574          | 9,574           |
| 2021              | 8,617                          | 7,181 <sup>c</sup> | 7,181        | 7,181      | 7,181            | 7,181          | 7,181           |
| 2022              | 7,659                          | 7,181 <sup>c</sup> | 7,181        | 7,181      | 7,181            | 7,181          | 7,181           |
| 2023              | 6,702                          | 7,181 <sup>c</sup> | 7,181        | 7,181      | 7,181            | 7,181          | 7,181           |
| 2024              | 5,744                          | 7,181 <sup>c</sup> | 7,181        | 7,181      | 7,181            | 7,181          | 7,181           |
| 2025              | 4,787                          | 4,787              | 4,787        | 4,787      | 4,787            | 4,787          | 4,787           |
| 2026              | 4,787                          | 4,787              | 1,609        | 1,693      | 1,644            | 1,619          | 1,733           |
| 2027              | 4,787                          | 4,787              | 378          | 378        | 378              | 377            | 381             |
| 2028              | 4,787                          | 4,787              | 384          | 384        | 384              | 383            | 384             |
| 2029              | 4,787                          | 4,787              | 383          | 384        | 383              | 383            | 384             |
| 2030              | 4,787                          | 4,787              | 384          | 384        | 384              | 383            | 384             |

<sup>a</sup> Viremic cases only; <sup>b</sup> 2015-2016 based on Public Health Agency of Canada data, 2017-2030 based on trend; <sup>c</sup> Average of 2021-2024.

**eTable 4. Fixed Input Parameters: Treatment Eligibility Requirements and New Infections**

This table presents the eligibility requirements entered into the model for indicated years, including age and fibrosis stage. Average SVR rates input for each year are also provided. Average projected number of new HCV infections for 2021-2024 were input for each of those years.

| Year | Eligible Age | Average SVR rate | Medically Eligible | New infections |                    |
|------|--------------|------------------|--------------------|----------------|--------------------|
|      |              |                  |                    | Projected      | Input              |
| 2015 | 15-74        | 90%              | ≥F2                | 2,500          | 2,500              |
| 2016 | 15-85+       | 90%              | ≥F2                | 2,500          | 2,500              |
| 2017 | 15-85+       | 95%              | ≥F2                | 2,500          | 2,500              |
| 2018 | 15-85+       | 95%              | ≥F0                | 2,250          | 2,250              |
| 2019 | 15-85+       | 95%              | ≥F0                | 2,000          | 2,000              |
| 2020 | 15-85+       | 95%              | ≥F0                | 1,750          | 1,750              |
| 2021 | 15-85+       | 95%              | ≥F0                | 1,500          | 1,125 <sup>a</sup> |
| 2022 | 15-85+       | 95%              | ≥F0                | 1,250          | 1,125 <sup>a</sup> |
| 2023 | 15-85+       | 95%              | ≥F0                | 1,000          | 1,125 <sup>a</sup> |
| 2024 | 15-85+       | 95%              | ≥F0                | 750            | 1,125 <sup>a</sup> |
| 2025 | 15-85+       | 95%              | ≥F0                | 500            | 500                |
| 2026 | 15-85+       | 95%              | ≥F0                | 500            | 500                |
| 2027 | 15-85+       | 95%              | ≥F0                | 500            | 500                |
| 2028 | 15-85+       | 95%              | ≥F0                | 500            | 500                |
| 2029 | 15-85+       | 95%              | ≥F0                | 500            | 500                |
| 2030 | 15-85+       | 95%              | ≥F0                | 500            | 500                |

<sup>a</sup> Average of 2021-2024; SVR, sustained virologic response; F, fibrosis stage

**eTable 5. Sustained Virologic Response Rates Applied in the Model**

This table presents the sustained virologic response rates entered into the model by time period (calendar years) for different HCV genotypes based on expert consensus and informed by published literature.

|                                               | SVR rate applied (%) <sup>a</sup> |           |      |           |      |           |
|-----------------------------------------------|-----------------------------------|-----------|------|-----------|------|-----------|
| Year                                          | 1990-2011                         | 2012-2013 | 2014 | 2015-2016 | 2017 | 2018-2030 |
| <b>Treatment eligibility (Fibrosis stage)</b> | ≥F2                               | ≥F2       | ≥F2  | ≥F2       | ≥F2  | ≥F0       |
| <b>G1</b>                                     | 40                                | 60        | 85   | 90        | 95   | 95        |
| <b>G2</b>                                     | 66                                | 70        | 85   | 90        | 95   | 95        |
| <b>G3</b>                                     | 66                                | 70        | 70   | 90        | 95   | 95        |
| <b>G4/5/6</b>                                 | 40                                | 48        | 85   | 90        | 95   | 95        |

SVR, sustained virologic response; F, fibrosis stage; G, genotype.

<sup>a</sup>Based on expert consensus (CanHepC Collaborators) informed by existing literature including (but not limited to): McHutchison et al.<sup>3</sup>, Myers et al.<sup>4</sup>, Manns et al.<sup>5</sup>, Ismail<sup>6</sup>, Bachofner et al.<sup>7</sup>, Janjua et al.<sup>8</sup>, Darvishian et al.<sup>9</sup>, Wilton et al.<sup>10</sup>, as summarized by Alexopoulou et al.<sup>11</sup>, Shafraan<sup>12</sup>, Zoratti et al.<sup>13</sup>

**eTable 6. Treatment Scenario Assumptions Entered Into the Model**

This table presents the assumptions entered for each HCV treatment scenario by waves (calendar years).

|                             | Base                   | Wave 1                  | Wave 2 | Wave 3 | Wave 4                 | Wave 5                 |
|-----------------------------|------------------------|-------------------------|--------|--------|------------------------|------------------------|
| Year                        | 2017                   | 2018                    | 2019   | 2020   | 2021-2024 <sup>a</sup> | 2025-2030 <sup>a</sup> |
| <b>Age eligibility</b>      | 15-85+                 | 15-85+                  | 15-85+ | 15-85+ | 15-85+                 | 15-85+                 |
| <b>Fibrosis eligibility</b> | ≥F2                    | ≥F0                     | ≥F0    | ≥F0    | ≥F0                    | ≥F0                    |
| <b>Average SVR</b>          | 95%                    | 95%                     | 95%    | 95%    | 95%                    | 95%                    |
| <b>New diagnoses</b>        | 8,934                  | 9,202                   | 9,386  | 9,574  | 7,181                  | 4,787                  |
| <b>New infections</b>       | 2,500                  | 2,250                   | 2,000  | 1,750  | 1,125                  | 500                    |
| <b>Number treated</b>       |                        | <b>Optimistic</b>       |        |        |                        |                        |
|                             | 12,718                 | 10,200                  | 10,200 | 10,200 | 10,200                 | 10,200                 |
|                             |                        | <b>Aggressive</b>       |        |        |                        |                        |
|                             | 12,718                 | 14,000                  | 14,000 | 12,000 | 12,000                 | 10,000                 |
|                             |                        | <b>Gradual decrease</b> |        |        |                        |                        |
|                             | 12,718                 | 12,000                  | 11,708 | 11,417 | 10,688                 | 9,229                  |
|                             |                        | <b>Rapid decrease</b>   |        |        |                        |                        |
| 12,718                      | 12,000                 | 11,375                  | 10,750 | 9,188  | 6,063                  |                        |
|                             | <b>Very aggressive</b> |                         |        |        |                        |                        |
| 12,718                      | 14,000                 | 14,000                  | 14,000 | 14,000 | 14,000                 |                        |

<sup>a</sup>Average values for indicated period; SVR, sustained virologic response; F, fibrosis stage



**eTable 7. Treatment scenarios: annual number of treated individuals**

This table presents the annual number of treated individuals for each treatment scenario. Projected and input counts are provided, where the average projected values for 2021-2024 and for 2025-2030, respectively, were input for each of those years.

| Year        | Optimistic |        | Aggressive |        | Gradual decrease |                     | Rapid decrease |                    | Very aggressive |        |
|-------------|------------|--------|------------|--------|------------------|---------------------|----------------|--------------------|-----------------|--------|
|             | Projected  | Input  | Projected  | Input  | Projected        | Input               | Projected      | Input              | Projected       | Input  |
| <b>2015</b> | 11,138     | 11,138 | 11,138     | 11,138 | 11,138           | 11,138              | 11,138         | 11,138             | 11,138          | 11,138 |
| <b>2016</b> | 10,496     | 10,496 | 10,496     | 10,496 | 10,496           | 10,496              | 10,496         | 10,496             | 10,496          | 10,496 |
| <b>2017</b> | 12,718     | 12,718 | 12,718     | 12,718 | 12,718           | 12,718              | 12,718         | 12,718             | 12,718          | 12,718 |
| <b>2018</b> | 10,200     | 10,200 | 14,000     | 14,000 | 12,000           | 12,000              | 12,000         | 12,000             | 14,000          | 14,000 |
| <b>2019</b> | 10,200     | 10,200 | 14,000     | 14,000 | 11,708           | 11,708              | 11,375         | 11,375             | 14,000          | 14,000 |
| <b>2020</b> | 10,200     | 10,200 | 12,000     | 12,000 | 11,417           | 11,417              | 10,750         | 10,750             | 14,000          | 14,000 |
| <b>2021</b> | 10,200     | 10,200 | 12,000     | 12,000 | 11,125           | 10,688 <sup>a</sup> | 10,125         | 9,188 <sup>a</sup> | 14,000          | 14,000 |
| <b>2022</b> | 10,200     | 10,200 | 12,000     | 12,000 | 10,833           | 10,688 <sup>a</sup> | 9,500          | 9,188 <sup>a</sup> | 14,000          | 14,000 |
| <b>2023</b> | 10,200     | 10,200 | 12,000     | 12,000 | 10,542           | 10,688 <sup>a</sup> | 8,875          | 9,188 <sup>a</sup> | 14,000          | 14,000 |
| <b>2024</b> | 10,200     | 10,200 | 12,000     | 12,000 | 10,250           | 10,688 <sup>a</sup> | 8,250          | 9,188 <sup>a</sup> | 14,000          | 14,000 |
| <b>2025</b> | 10,200     | 10,200 | 10,000     | 10,000 | 9,958            | 9,229 <sup>a</sup>  | 7,625          | 6,063 <sup>a</sup> | 14,000          | 14,000 |
| <b>2026</b> | 10,200     | 10,200 | 10,000     | 10,000 | 9,667            | 9,229 <sup>a</sup>  | 7,000          | 6,063 <sup>a</sup> | 14,000          | 14,000 |
| <b>2027</b> | 10,200     | 10,200 | 10,000     | 10,000 | 9,375            | 9,229 <sup>a</sup>  | 6,375          | 6,063 <sup>a</sup> | 14,000          | 14,000 |
| <b>2028</b> | 10,200     | 10,200 | 10,000     | 10,000 | 9,083            | 9,229 <sup>a</sup>  | 5,750          | 6,063 <sup>a</sup> | 14,000          | 14,000 |
| <b>2029</b> | 10,200     | 10,200 | 10,000     | 10,000 | 8,792            | 9,229 <sup>a</sup>  | 5,125          | 6,063 <sup>a</sup> | 14,000          | 14,000 |
| <b>2030</b> | 10,200     | 10,200 | 10,000     | 10,000 | 8,500            | 9,229 <sup>a</sup>  | 4,500          | 6,063 <sup>a</sup> | 14,000          | 14,000 |

<sup>a</sup>Average of 2021-2024 or 2025-2030, respectively.

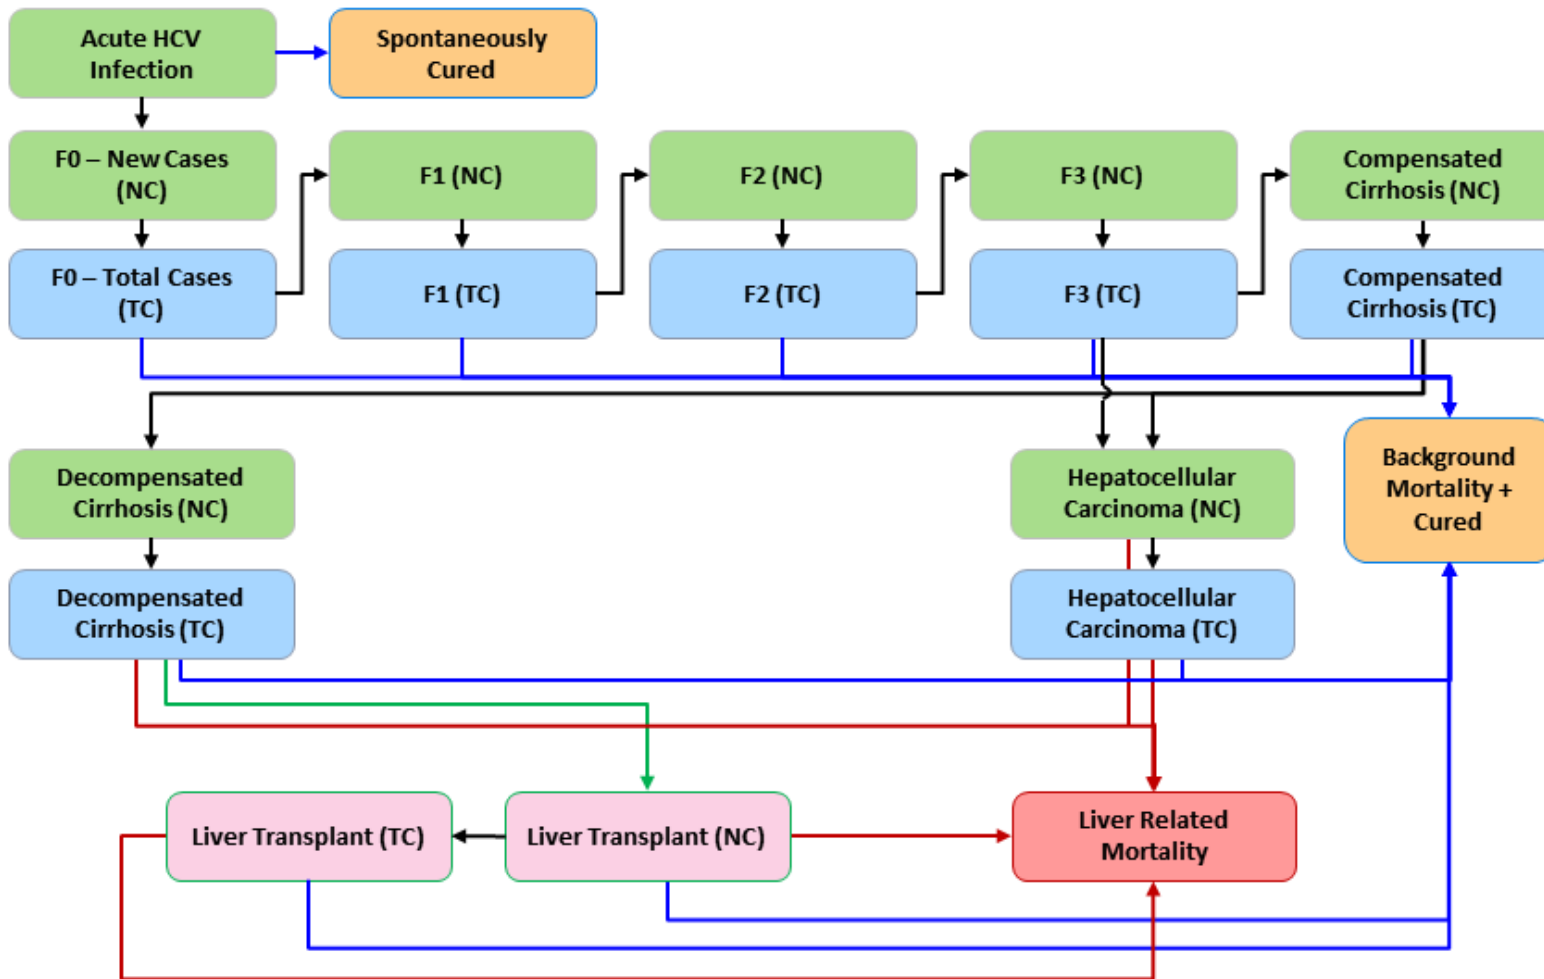

**eFigure 1. Flow diagram of disease progression within the model.** NC, new cases; TC, total cases. Adapted from The Lancet Gastroenterology & Hepatology, 2017, 2(3): 161-76, Blach S, Zeuzem S, Manns M, et al. Global prevalence and genotype distribution of hepatitis C virus infection in 2015: a modelling study, with permission from Elsevier and the corresponding author<sup>14</sup>

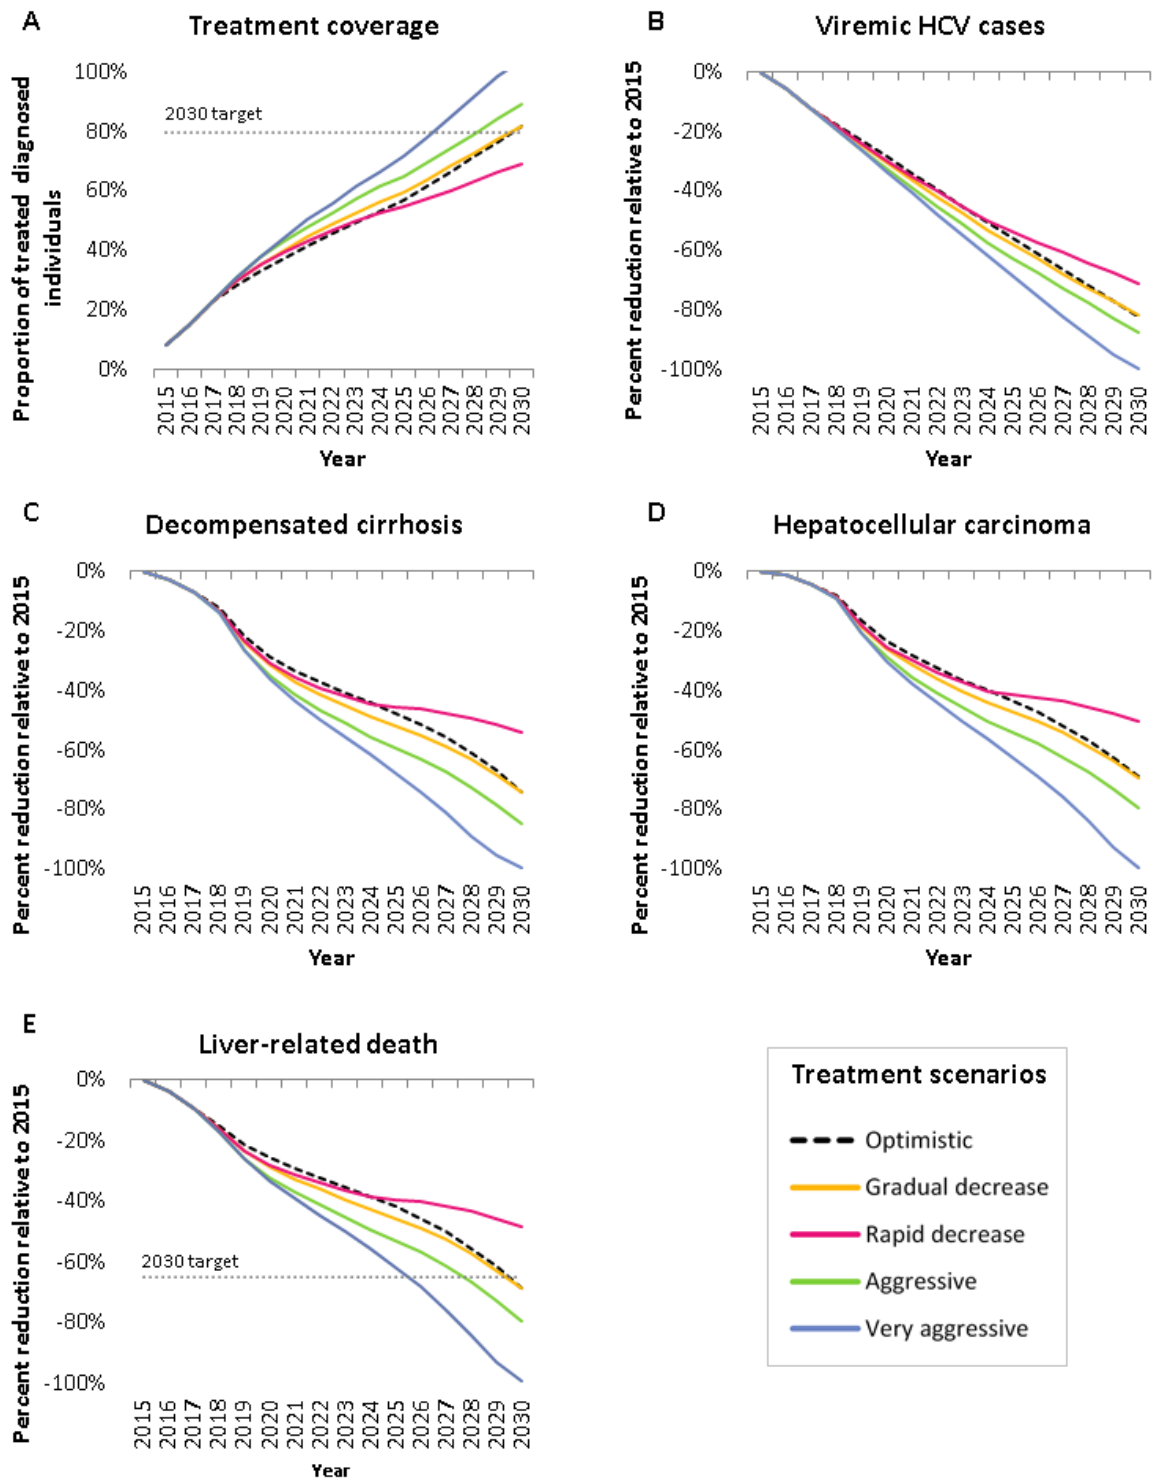

**eFigure 2. Projected trends in HCV-related outcomes with each treatment scenario.** Annual change in (A) HCV treatment coverage, (B) viremic HCV cases, (C) decompensated cirrhosis, (D) hepatocellular carcinoma and (E) liver-related death with different treatment scenarios. HCV: hepatitis C virus.

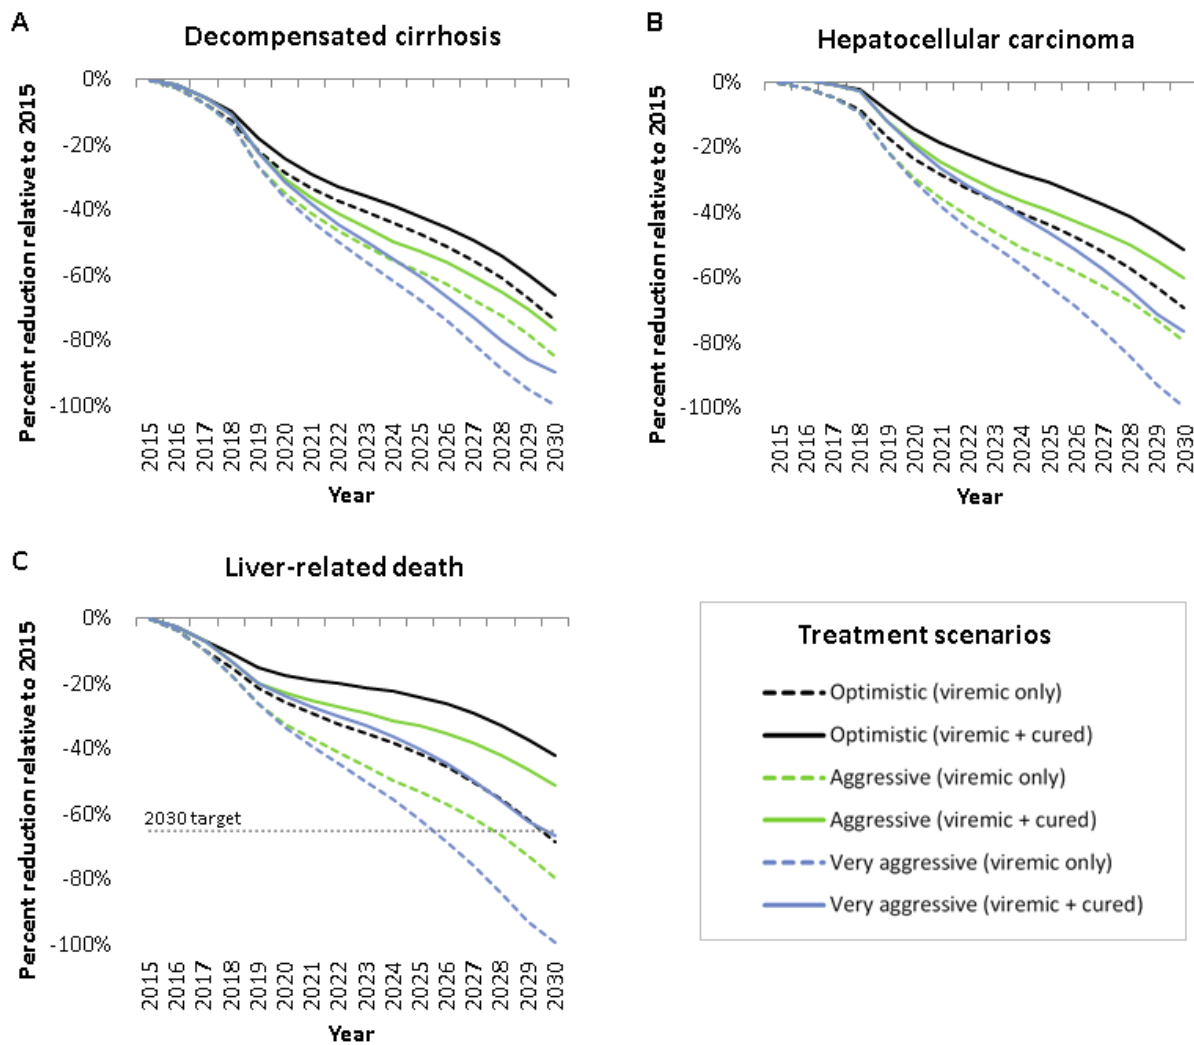

**eFigure 3. The impact of advanced liver disease diagnoses among patients achieving sustained virologic response post-HCV treatment.** Impact of sustained virologic response on (A) decompensated cirrhosis, (B) hepatocellular carcinoma and (C) liver-related death estimates from different treatment scenarios. Dashed lines: viremic HCV cases only; Solid lines: viremic and cured HCV cases. HCV: hepatitis C virus.

## eReferences

1. United Nations Department of Economic and Social Affairs Population Division. World Population Prospects: The 2017 Revision. 2017; <https://esa.un.org/unpd/wpp/Download/Standard/Population/>. Accessed February 7, 2018.
2. Public Health Agency of Canada. Reported cases by age group in Canada, grouped by sex - Notifiable diseases on-line. 2017; <http://diseases.canada.ca/notifiable/charts?c=abs> Accessed February 7, 2018.
3. McHutchison JG, Lawitz EJ, Shiffman ML, et al. Peginterferon Alfa-2b or Alfa-2a with Ribavirin for Treatment of Hepatitis C Infection. *New England Journal of Medicine*. 2009;361(6):580-593.
4. Myers RP, Krajden M, Bilodeau M, et al. Burden of disease and cost of chronic hepatitis C virus infection in Canada. *Canadian Journal of Gastroenterology & Hepatology*. 2014;28(5):243-250.
5. Manns M, Zeuzem S, Sood A, et al. Reduced dose and duration of peginterferon alfa-2b and weight-based ribavirin in patients with genotype 2 and 3 chronic hepatitis C. *Journal of hepatology*. 2011;55(3):554-563.
6. Ismail MH. Prediction of sustained virologic responses to combination therapy of pegylated interferon- $\alpha$  and ribavirin in patients with chronic hepatitis C infection. *J Family Community Med*. 2013;20(1):35-40.
7. Bachofner J, Valli PV, Bergamin I, et al. Excellent outcome of direct antiviral treatment for chronic hepatitis C in Switzerland. *Swiss medical weekly*. 2018;148:w14560.
8. Janjua NZ, Darvishian M, Wong S, et al. Effectiveness of Ledipasvir/Sofosbuvir and Sofosbuvir/Velpatasvir in People Who Inject Drugs and/or Those in Opioid Agonist Therapy. *Hepatol Commun*. 2019;3(4):478-492.
9. Darvishian M, Wong S, Binka M, et al. Loss to follow-up: A significant barrier in the treatment cascade with direct-acting therapies. *Journal of Viral Hepatitis*. 2020;27(3):243-260.
10. Wilton J, Wong S, Yu A, et al. Real-world effectiveness of sofosbuvir/velpatasvir for treatment of chronic hepatitis C in British Columbia, Canada: A population-based cohort study. *Open Forum Infectious Diseases*. 2020.
11. Alexopoulou A, Karayiannis P. Interferon-based combination treatment for chronic hepatitis C in the era of direct acting antivirals. *Ann Gastroenterol*. 2015;28(1):55-65.
12. Shafran SD. HIV Coinfected Have Similar SVR Rates as HCV Monoinfected With DAAs: It's Time to End Segregation and Integrate HIV Patients Into HCV Trials. *Clinical Infectious Diseases*. 2015;61(7):1127-1134.
13. Zoratti MJ, Siddiqua A, Morassut RE, et al. Pangenotypic direct acting antivirals for the treatment of chronic hepatitis C virus infection: A systematic literature review and meta-analysis. *EClinicalMedicine*. 2020;18.
14. Blach S, Zeuzem S, Manns M, et al. Global prevalence and genotype distribution of hepatitis C virus infection in 2015: a modelling study. *The Lancet Gastroenterology & Hepatology*. 2017;2(3):161-176.
